# Supplementary material
Source: bioRxiv or medRxiv preprint supplement (https://www.biorxiv.org/highwire/filestream/67774/field_highwire_adjunct_files/9/157404-3.pdf)
Supplement: Supplementary file [file 157404-3.pdf]

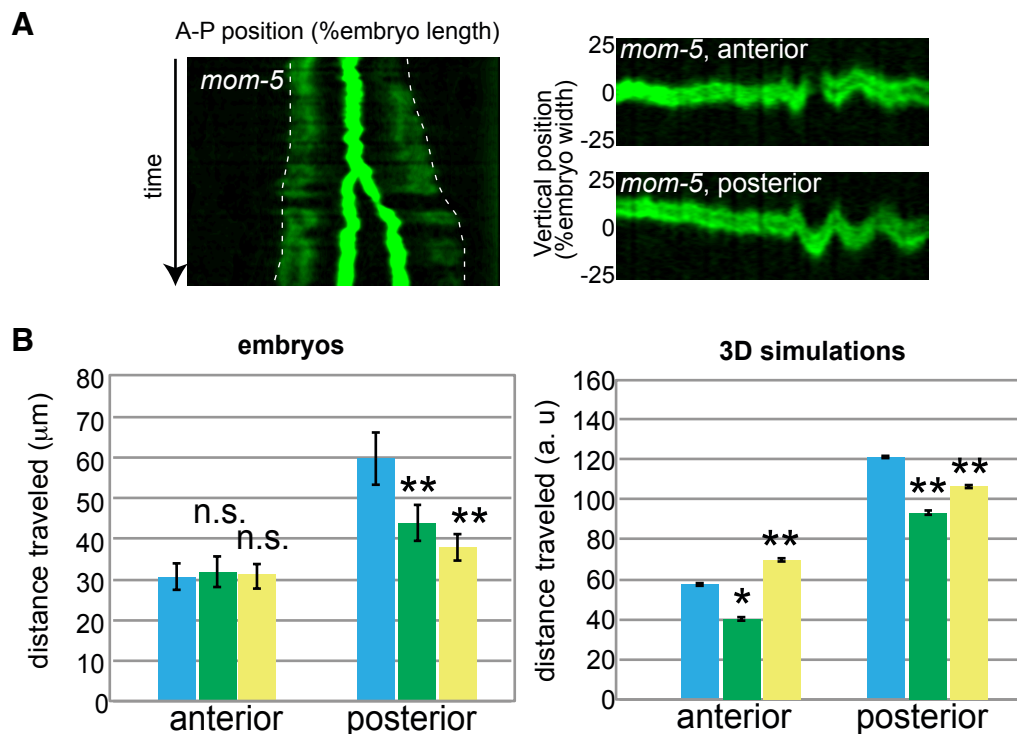

**Figure S3. Effects of *mom-5(RNAi)* on spindle pole movements and embryo sizes.**

(A) Kymographs of the spindle movements in *mom-5(RNAi)*. Kymographs were generated as in Figure 2. (B) Distance traveled by the anterior or posterior spindle poles. Total distance centrosome traveled for  $\pm 40$  sec and  $\pm 100$  sec from anaphase onset were shown for *in vivo* measurements (left) and 3D simulations (right). Error bars show 95% CI. Asterisk indicate  $p < 0.05$  compared to control (Kruskal-Wallis test followed by Dunn's multiple comparison test).
